# Supplementary figures and images for: View-based strategy for reorientation by geometry
Source: Oxford University Press journal article supplement (doi:10.1242/jeb.043315), 2010-08-13

### A) Variable access condition

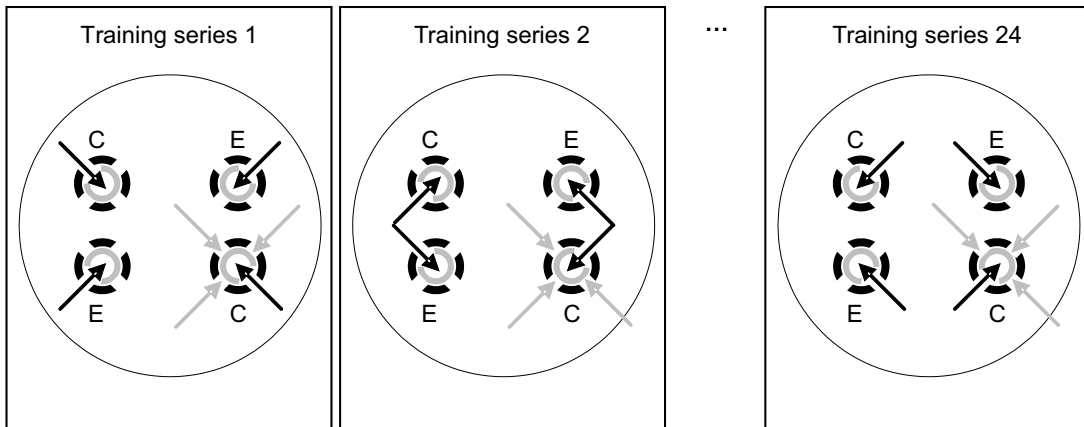

### B) Fixed access condition

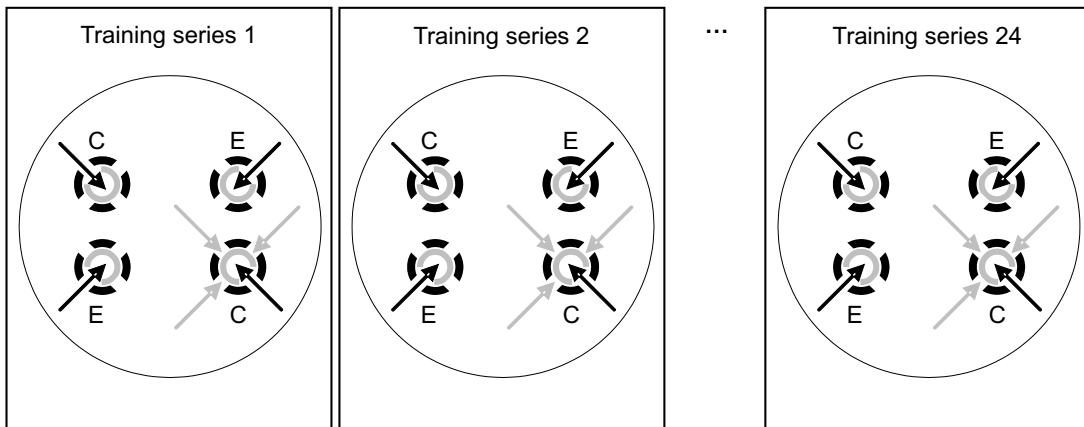

Supplement: jeb043315figs1.pdf [file jeb043315figs1.pdf]
